# Supplementary material
Source: Elsevier journal article supplement (https://www.sciencedirect.com/science/article/pii/S1885585720302735)
Supplement: mmc1 [file mmc1.pdf]

**SUPPLEMENTARY DATA**

Table 1 of the supplementary data

CCS codes used to identify relevant diagnoses

|                               |                                                            |
|-------------------------------|------------------------------------------------------------|
| <i>Heart failure</i>          |                                                            |
| 00108                         | Congestive heart failure, non hypertensive                 |
| <i>Diabetes</i>               |                                                            |
| 00049                         | Diabetes mellitus, no complications mentioned              |
| 00050                         | Diabetes mellitus with complications                       |
| <i>Hypertension</i>           |                                                            |
| 00098                         | Essential hypertension                                     |
| 00099                         | Hypertension with complications and secondary hypertension |
| <i>Chronic kidney disease</i> |                                                            |
| 00158                         | Chronic kidney disease                                     |
| <i>Ischemic heart disease</i> |                                                            |
| 00100                         | Acute myocardial infarction                                |
| 00101                         | Coronary atherosclerosis                                   |

CCS, clinical classifications software.

Table 2 of the supplementary data

ICD-9-CM codes used to identify relevant diagnoses

|                      |                                                                                                                                                         |
|----------------------|---------------------------------------------------------------------------------------------------------------------------------------------------------|
| <i>Heart failure</i> |                                                                                                                                                         |
| 398.91               | Rheumatic heart failure (congestive)                                                                                                                    |
| 402.01               | Malignant hypertensive heart disease with heart failure                                                                                                 |
| 402.11               | Benign hypertensive heart disease with heart failure                                                                                                    |
| 402.91               | Unspecified hypertensive heart disease with heart failure                                                                                               |
| 404.01               | Hypertensive heart and chronic kidney disease, malignant, with heart failure and with chronic kidney disease stage I through stage IV, or unspecified   |
| 404.03               | Hypertensive heart and chronic kidney disease, malignant, with heart failure and with chronic kidney disease stage V or end stage renal disease         |
| 404.11               | Hypertensive heart and chronic kidney disease, benign, with heart failure and with chronic kidney disease stage I through stage IV, or unspecified      |
| 404.13               | Hypertensive heart and chronic kidney disease, benign, with heart failure and chronic kidney disease stage V or end stage renal disease                 |
| 404.91               | Hypertensive heart and chronic kidney disease, unspecified, with heart failure and with chronic kidney disease stage I through stage IV, or unspecified |
| 404.93               | Hypertensive heart and chronic kidney disease, unspecified, with heart failure and chronic kidney disease stage V or end stage renal disease            |
| 428                  | Heart failure                                                                                                                                           |
| 428.0                | Congestive heart failure, unspecified                                                                                                                   |
| 428.1                | Left heart failure                                                                                                                                      |
| 428.2, 428.2x        | Systolic heart failure                                                                                                                                  |
| 428.3, 428.3x        | Diastolic heart failure                                                                                                                                 |
| 428.4, 428.4x        | Combined systolic and diastolic heart failure                                                                                                           |
| 428.9                | Heart failure, unspecified                                                                                                                              |
| <i>Diabetes</i>      |                                                                                                                                                         |
| 250                  | Diabetes mellitus                                                                                                                                       |
| 250.0, 250.0x        | Diabetes mellitus without mention of complication                                                                                                       |
| 250.1, 250.1x        | Diabetes with ketoacidosis                                                                                                                              |
| 250.2, 250.2x        | Diabetes with hyperosmolarity                                                                                                                           |
| 250.3, 250.3x        | Diabetes with other coma                                                                                                                                |
| 250.4, 250.4x        | Diabetes with renal manifestations                                                                                                                      |
| 250.5, 250.5x        | Diabetes with ophthalmic manifestations                                                                                                                 |
| 250.6, 250.6x        | Diabetes with neurological manifestations                                                                                                               |
| 250.7, 250.7x        | Diabetes with peripheral circulatory disorders                                                                                                          |
| 250.8, 250.8x        | Diabetes with other specified manifestations                                                                                                            |
| 250.9, 250.9x        | Diabetes with unspecified complication                                                                                                                  |
| <i>Hypertension</i>  |                                                                                                                                                         |
| 401                  | Essential hypertension                                                                                                                                  |
| 401.0                | Malignant essential hypertension                                                                                                                        |
| 401.1                | Benign essential hypertension                                                                                                                           |
| 401.9                | Unspecified essential hypertension                                                                                                                      |
| 402                  | Hypertensive heart disease                                                                                                                              |
| 402.0, 402.0x        | Malignant hypertensive heart disease                                                                                                                    |
| 402.1, 402.1x        | Benign hypertensive heart disease                                                                                                                       |
| 402.9, 402.9x        | Unspecified hypertensive heart disease                                                                                                                  |
| 403                  | Hypertensive chronic kidney disease                                                                                                                     |

|                               |                                                                                                                                                            |
|-------------------------------|------------------------------------------------------------------------------------------------------------------------------------------------------------|
| 403.0, 403.0x                 | Malignant hypertensive renal disease                                                                                                                       |
| 403.1, 403.1x                 | Benign hypertensive renal disease                                                                                                                          |
| 403.9, 403.9x                 | Unspecified hypertensive renal disease                                                                                                                     |
| 404                           | Hypertensive heart and chronic kidney disease                                                                                                              |
| 404.0, 404.0x                 | Malignant hypertensive heart and renal disease                                                                                                             |
| 404.1, 404.1x                 | Benign hypertensive heart and renal disease                                                                                                                |
| 404.9, 404.9x                 | Unspecified hypertensive heart and renal disease                                                                                                           |
| 405                           | Secondary hypertension                                                                                                                                     |
| 405.0, 405.0x                 | Malignant secondary hypertension                                                                                                                           |
| 405.1, 405.1x                 | Benign secondary hypertension                                                                                                                              |
| 405.9, 405.9x                 | Unspecified secondary hypertension                                                                                                                         |
| <i>Chronic kidney disease</i> |                                                                                                                                                            |
| 403.00                        | Hypertensive chronic kidney disease, malignant, with chronic kidney disease stage I through stage IV, or unspecified                                       |
| 403.01                        | Hypertensive chronic kidney disease, malignant, with chronic kidney disease stage V or end stage renal disease                                             |
| 403.10                        | Hypertensive chronic kidney disease, benign, with chronic kidney disease stage I through stage IV, or unspecified                                          |
| 403.11                        | Hypertensive chronic kidney disease, benign, with chronic kidney disease stage V or end stage renal disease                                                |
| 403.90                        | Hypertensive chronic kidney disease, unspecified, with chronic kidney disease stage I through stage IV, or unspecified                                     |
| 403.91                        | Hypertensive chronic kidney disease, unspecified, with chronic kidney disease stage V or end stage renal disease                                           |
| 404.00                        | Hypertensive heart and chronic kidney disease, malignant, without heart failure and with chronic kidney disease stage I through stage IV, or unspecified   |
| 404.01                        | Hypertensive heart and chronic kidney disease, malignant, with heart failure and with chronic kidney disease stage I through stage IV, or unspecified      |
| 404.02                        | Hypertensive heart and chronic kidney disease, malignant, without heart failure and with chronic kidney disease stage V or end stage renal disease         |
| 404.03                        | Hypertensive heart and chronic kidney disease, malignant, with heart failure and with chronic kidney disease stage V or end stage renal disease            |
| 404.10                        | Hypertensive heart and chronic kidney disease, benign, without heart failure and with chronic kidney disease stage I through stage IV, or unspecified      |
| 404.11                        | Hypertensive heart and chronic kidney disease, benign, with heart failure and with chronic kidney disease stage I through stage IV, or unspecified         |
| 404.12                        | Hypertensive heart and chronic kidney disease, benign, without heart failure and with chronic kidney disease stage V or end stage renal disease            |
| 404.13                        | Hypertensive heart and chronic kidney disease, benign, with heart failure and chronic kidney disease stage V or end stage renal disease                    |
| 404.90                        | Hypertensive heart and chronic kidney disease, unspecified, without heart failure and with chronic kidney disease stage I through stage IV, or unspecified |
| 404.91                        | Hypertensive heart and chronic kidney disease, unspecified, with heart failure and with chronic kidney disease stage I through stage IV, or unspecified    |
| 404.92                        | Hypertensive heart and chronic kidney disease, unspecified, without heart failure and with chronic kidney disease stage V or end stage renal disease       |
| 404.93                        | Hypertensive heart and chronic kidney disease, unspecified, with heart failure and chronic kidney disease stage V or end stage renal disease               |
| 582.xx                        | Chronic glomerulonephritis                                                                                                                                 |
| 585                           | Chronic kidney disease                                                                                                                                     |

|                               |                                                                      |
|-------------------------------|----------------------------------------------------------------------|
| 585.1                         | Chronic kidney disease, Stage I                                      |
| 585.2                         | Chronic kidney disease, Stage II (mild)                              |
| 585.3                         | Chronic kidney disease, Stage III (moderate)                         |
| 585.4                         | Chronic kidney disease, Stage IV (severe)                            |
| 585.5                         | Chronic kidney disease, Stage V                                      |
| 585.6                         | End stage renal disease                                              |
| 585.9                         | Chronic kidney disease, unspecified                                  |
| 458.21                        | Hypotension of hemodialysis                                          |
| 792.5                         | Cloudy (hemodialysis) (peritoneal) dialysis effluent                 |
| 996.81                        | Complications of transplanted kidney                                 |
| 996.73                        | Other complications due to renal dialysis device, implant, and graft |
| 996.56                        | Mechanical complication due to peritoneal dialysis catheter          |
| V42.0                         | Kidney replaced by transplant                                        |
| V45.1x                        | Renal dialysis status                                                |
| V56.xx                        | Encounter for extracorporeal dialysis                                |
| <i>Ischemic heart disease</i> |                                                                      |
| 410                           | Acute myocardial infarction                                          |
| 410.0, 410.0x                 | Acute myocardial infarction of anterolateral wall                    |
| 410.1, 410.1x                 | Acute myocardial infarction of other anterior wall                   |
| 410.2, 410.2x                 | Acute myocardial infarction of inferolateral wall                    |
| 410.3, 410.3x                 | Acute myocardial infarction of inferoposterior wall                  |
| 410.4, 410.4x                 | Acute myocardial infarction of other inferior wall                   |
| 410.5, 410.5x                 | Acute myocardial infarction of other lateral wall                    |
| 410.6, 410.6x                 | True posterior wall infarction                                       |
| 410.7, 410.7x                 | Subendocardial infarction                                            |
| 410.8, 410.8x                 | Acute myocardial infarction of other specified sites                 |
| 410.9, 410.9x                 | Acute myocardial infarction of unspecified site                      |
| 411                           | Other acute and subacute forms of ischemic heart disease             |
| 411.0                         | Postmyocardial infarction syndrome                                   |
| 411.1                         | Intermediate coronary syndrome                                       |
| 411.8, 411.8x                 | Other acute and subacute forms of ischemic heart disease             |
| 412                           | Old myocardial infarction                                            |
| 413                           | Angina pectoris                                                      |
| 413.0                         | Angina decubitus                                                     |
| 413.1                         | Prinzmetal angina                                                    |
| 413.9                         | Other and unspecified angina pectoris                                |
| 414                           | Other forms of chronic ischemic heart disease                        |
| 414.0, 414.0x                 | Coronary atherosclerosis                                             |
| 414.1, 414.1x                 | Aneurysm and dissection of heart                                     |
| 414.2                         | Chronic total occlusion of coronary artery                           |
| 414.3                         | Coronary atherosclerosis due to lipid rich plaque                    |
| 414.4                         | Coronary atherosclerosis due to calcified coronary lesion            |
| 414.8                         | Other specified forms of chronic ischemic heart disease              |
| 414.9                         | Chronic ischemic heart disease, unspecified                          |
| 996.03                        | Mechanical complication due to coronary bypass graft                 |
| V45.81                        | Aortocoronary bypass status                                          |
| V45.82                        | Percutaneous transluminal coronary angioplasty status                |

ICD-9-CM, International Classification of Diseases, 9th Revision, Clinical Modification.

Table 3 of the supplementary data

ICD-10 codes used to identify relevant diagnoses

|                               |                                                                                             |
|-------------------------------|---------------------------------------------------------------------------------------------|
| <i>Heart failure</i>          |                                                                                             |
| I09.9                         | Rheumatic heart disease, unspecified                                                        |
| I11.0                         | Hypertensive heart disease with (congestive) heart failure                                  |
| I13.0                         | Hypertensive heart and renal disease with (congestive) heart failure                        |
| I13.2                         | Hypertensive heart and renal disease with both (congestive) heart failure and renal failure |
| I50.0                         | Congestive heart failure                                                                    |
| I50.1                         | Left ventricular failure                                                                    |
| I50.9                         | Heart failure, unspecified                                                                  |
| <i>Diabetes</i>               |                                                                                             |
| E10                           | Type 1 diabetes mellitus                                                                    |
| E11                           | Type 2 diabetes mellitus                                                                    |
| E12                           | Malnutrition-related diabetes mellitus                                                      |
| E13                           | Other specified diabetes mellitus                                                           |
| E14                           | Unspecified diabetes mellitus                                                               |
| <i>Hypertension</i>           |                                                                                             |
| I10                           | Essential (primary) hypertension                                                            |
| I11.0                         | Hypertensive heart disease with (congestive) heart failure                                  |
| I11.9                         | Hypertensive heart disease without (congestive) heart failure                               |
| I12.0                         | Hypertensive renal disease with renal failure                                               |
| I12.9                         | Hypertensive renal disease without renal failure                                            |
| I13.0                         | Hypertensive heart and renal disease with (congestive) heart failure                        |
| I13.1                         | Hypertensive heart and renal disease with renal failure                                     |
| I13.2                         | Hypertensive heart and renal disease with both (congestive) heart failure and renal failure |
| I13.9                         | Hypertensive heart and renal disease, unspecified                                           |
| I15.0                         | Renovascular hypertension                                                                   |
| I15.1                         | Hypertension secondary to other renal disorders                                             |
| I15.2                         | Hypertension secondary to endocrine disorders                                               |
| I15.8                         | Other secondary hypertension                                                                |
| I15.9                         | Secondary hypertension, unspecified                                                         |
| <i>Chronic kidney disease</i> |                                                                                             |
| I12.0                         | Hypertensive renal disease with renal failure                                               |
| I13.0                         | Hypertensive heart and renal disease with (congestive) heart failure                        |
| I13.1                         | Hypertensive heart and renal disease with renal failure                                     |
| I13.2                         | Hypertensive heart and renal disease with both (congestive) heart failure and renal failure |
| I13.9                         | Hypertensive heart and renal disease, unspecified                                           |
| N18.1                         | Chronic kidney disease, stage 1                                                             |
| N18.2                         | Chronic kidney disease, stage 2                                                             |
| N18.3                         | Chronic kidney disease, stage 3                                                             |
| N18.4                         | Chronic kidney disease, stage 4                                                             |
| N18.5                         | Chronic kidney disease, stage 5                                                             |
| N18.9                         | Chronic kidney disease, unspecified                                                         |
| T82.4                         | Mechanical complication of vascular dialysis catheter                                       |
| T86.1                         | Kidney transplant failure and rejection                                                     |

|                               |                                                                                                                         |
|-------------------------------|-------------------------------------------------------------------------------------------------------------------------|
| Y84.1                         | Kidney dialysis                                                                                                         |
| Z49                           | Care involving dialysis                                                                                                 |
| Z94.0                         | Kidney transplant status                                                                                                |
| Z99.2                         | Dependence on renal dialysis                                                                                            |
| <i>Ischemic heart disease</i> |                                                                                                                         |
| I20.0                         | Unstable angina                                                                                                         |
| I20.1                         | Angina pectoris with documented spasm                                                                                   |
| I20.8                         | Other forms of angina pectoris                                                                                          |
| I20.9                         | Angina pectoris, unspecified                                                                                            |
| I21.0                         | Acute transmural myocardial infarction of anterior wall                                                                 |
| I21.1                         | Acute transmural myocardial infarction of inferior wall                                                                 |
| I21.2                         | Acute transmural myocardial infarction of other sites                                                                   |
| I21.3                         | Acute transmural myocardial infarction of unspecified site                                                              |
| I21.4                         | Acute subendocardial myocardial infarction                                                                              |
| I21.9                         | Acute myocardial infarction, unspecified                                                                                |
| I22.0                         | Subsequent myocardial infarction of anterior wall                                                                       |
| I22.1                         | Subsequent myocardial infarction of inferior wall                                                                       |
| I22.8                         | Subsequent myocardial infarction of other sites                                                                         |
| I22.9                         | Subsequent myocardial infarction of unspecified site                                                                    |
| I23.0                         | Hemopericardium as current complication following acute myocardial infarction                                           |
| I23.1                         | Atrial septal defect as current complication following acute myocardial infarction                                      |
| I23.2                         | Ventricular septal defect as current complication following acute myocardial infarction                                 |
| I23.3                         | Rupture of cardiac wall without hemopericardium as current complication following acute myocardial infarction           |
| I23.4                         | Rupture of chordae tendineae as current complication following acute myocardial infarction                              |
| I23.5                         | Rupture of papillary muscle as current complication following acute myocardial infarction                               |
| I23.6                         | Thrombosis of atrium, auricular appendage, and ventricle as current complications following acute myocardial infarction |
| I23.8                         | Other current complications following acute myocardial infarction                                                       |
| I24.0                         | Coronary thrombosis not resulting in myocardial infarction                                                              |
| I24.1                         | Dressler syndrome                                                                                                       |
| I24.8                         | Other forms of acute ischemic heart disease                                                                             |
| I24.9                         | Acute ischemic heart disease, unspecified                                                                               |
| I25.0                         | Atherosclerotic cardiovascular disease, so described                                                                    |
| I25.1                         | Atherosclerotic heart disease                                                                                           |
| I25.2                         | Old myocardial infarction                                                                                               |
| I25.3                         | Aneurysm of heart                                                                                                       |
| I25.4                         | Coronary artery aneurysm and dissection                                                                                 |
| I25.5                         | Ischemic cardiomyopathy                                                                                                 |
| I25.6                         | Silent myocardial ischemia                                                                                              |
| I25.8                         | Other forms of chronic ischemic heart disease                                                                           |
| I25.9                         | Chronic ischemic heart disease, unspecified                                                                             |
| T82.2                         | Mechanical complication of coronary artery bypass and valve grafts                                                      |
| Z95.1                         | Presence of aortocoronary bypass graft                                                                                  |
| V45.82                        | Percutaneous transluminal coronary angioplasty status                                                                   |

ICD-10, International Classification of Diseases, 10th Revision

Table 4 of the supplementary data

ATC codes used to identify RAASI medications and other medications of interest

|                                                             |                                                                                          |
|-------------------------------------------------------------|------------------------------------------------------------------------------------------|
| <i>ACEIs (plain, or in combination)</i>                     |                                                                                          |
| Captopril                                                   | C09AA01, C09BA01                                                                         |
| Enalapril                                                   | C09AA02, C09AA02, C09BA02, C09BB02, C09BB06                                              |
| Lisinopril                                                  | C09AA03, C09BB03, C09BA03, C10BX07                                                       |
| Perindopril                                                 | C10BX15, C10BX12, C10BX11, C09AA04, C09BB04, C09BX02, C09BA04, C09BX01, C10BX14, C10BX13 |
| Ramipril                                                    | C10BX06, C09AA05, C09BB07, C09BA05, C09BB05, C09BX03, C10BX04                            |
| Quinapril                                                   | C09AA06, C09AA06, C09BA06                                                                |
| Benazepril                                                  | C09AA07, C09BA07                                                                         |
| Cilazapril                                                  | C09AA08, C09BA08                                                                         |
| Fosinopril                                                  | C09AA09, C09BA09                                                                         |
| Trandolapril                                                | C09AA10, C09BB10                                                                         |
| Spirapril                                                   | C09AA11                                                                                  |
| Delapril                                                    | C09AA12, C09BA12, C09BB12                                                                |
| Moexipril                                                   | C09AA13, C09BA13                                                                         |
| Temocapril                                                  | C09AA14                                                                                  |
| Zofenopril                                                  | C09AA15, C09BA15                                                                         |
| Imidapril                                                   | C09AA16                                                                                  |
| <i>ARBs (plain, or in combination)</i>                      |                                                                                          |
| Losartan                                                    | C09CA01, C09DB06, C09DA01                                                                |
| Eprosartan                                                  | C09CA02, C09DA02                                                                         |
| Valsartan*                                                  | C10BX10, C09CA03, C09DX02, C09DB01, C09DA03, C09DB08, C09DX04, C09DX01                   |
| Irbesartan                                                  | C09CA04, C09DB05, C09DA04                                                                |
| Tasosartan                                                  | C09CA05                                                                                  |
| Candesartan                                                 | C09CA06, C09DB07, C09DA06                                                                |
| Telmisartan                                                 | C09CA07, C09DB04, C09DA07                                                                |
| Olmesartan                                                  | C09CA08, C09DB02, C09DA08, C09DX03                                                       |
| Azilsartan                                                  | C09CA09, C09DA09                                                                         |
| Fimasartan                                                  | C09CA10, C09DA10                                                                         |
| <i>Rennin inhibitors</i>                                    |                                                                                          |
| Remikiren                                                   | C09XA01                                                                                  |
| Aliskiren                                                   | C09XA02, C09XA53, C09XA52, C09XA54, C09DX02                                              |
| <i>Aldosterone inhibitors (potassium-sparing diuretics)</i> |                                                                                          |
| Spirolactone                                                | C03DA01                                                                                  |
| Eplerenone                                                  | C03DA04                                                                                  |
| <i>Beta-blockers</i>                                        |                                                                                          |
| Betablocking agents                                         | C07                                                                                      |
| <i>Potassium supplements</i>                                |                                                                                          |
| Potassium supplements                                       | A12B                                                                                     |
| <i>Loop diuretics</i>                                       |                                                                                          |
| Furosemide                                                  | C03CA01, C03CB01, C03EB01                                                                |
| Torasemide                                                  | C03CA04                                                                                  |
| Bumetanide                                                  | C03CA02, C03CA02, C03CB02, C03EB02                                                       |
| <i>Trimethoprim</i>                                         |                                                                                          |

|                                                            |       |
|------------------------------------------------------------|-------|
| Trimethoprim and derivatives                               | J01EA |
| Combinations of sulfonamides and trimethoprim, Derivatives | J01EE |
| <i>Macrolides</i>                                          |       |
| Macrolides                                                 | J01FA |
| <i>NSAIDs</i>                                              |       |
| NSAIDs                                                     | M01A  |

ACEI, angiotensin converting enzyme inhibitor; ARB, angiotensin-receptor blocker; ATC, anatomical therapeutic chemical; NSAID, non-steroidal anti-inflammatory drug; RAASI, renin-angiotensin-aldosterone system inhibition.

\*Includes the combination valsartan/sacubitril (code C09DX04)



Table 5 of the supplementary data

Chronic morbidity groups included in the adjusted morbidity groups (AMG) classification system, by socioeconomic status

|                                                                    | Socioeconomic status |        |     |          |
|--------------------------------------------------------------------|----------------------|--------|-----|----------|
|                                                                    | High                 | Medium | Low | Very low |
| <i>Individuals with chronic conditions affecting 1 system</i>      |                      |        |     |          |
| Severity 1                                                         |                      |        |     |          |
| Severity 2                                                         |                      |        |     |          |
| Severity 3                                                         |                      |        |     |          |
| Severity 4                                                         |                      |        |     |          |
| Severity 5                                                         |                      |        |     |          |
| <i>Individuals with chronic conditions affecting 2-3 systems</i>   |                      |        |     |          |
| Severity 1                                                         |                      |        |     |          |
| Severity 2                                                         |                      |        |     |          |
| Severity 3                                                         |                      |        |     |          |
| Severity 4                                                         |                      |        |     |          |
| Severity 5                                                         |                      |        |     |          |
| <i>Individuals with chronic conditions affecting &gt;3 systems</i> |                      |        |     |          |
| Severity 1                                                         |                      |        |     |          |
| Severity 2                                                         |                      |        |     |          |
| Severity 3                                                         |                      |        |     |          |
| Severity 4                                                         |                      |        |     |          |
| Severity 5                                                         |                      |        |     |          |
| <i>Individuals with active cancer</i>                              |                      |        |     |          |
| Severity 1                                                         |                      |        |     |          |
| Severity 2                                                         |                      |        |     |          |
| Severity 3                                                         |                      |        |     |          |
| Severity 4                                                         |                      |        |     |          |
| Severity 5                                                         |                      |        |     |          |

Note that the AMG components “Acute disease” and “Pregnancy” were not used in this study of chronic patients aged 55 years or older. Within each component, severity was defined based on the total burden of comorbidities, prior health care resource use, and estimated risk of re-hospitalization.

Table 6 of the supplementary data

Average prices by activity, in Catalonia, as of 2016

| Concept                                                          | Average price            |
|------------------------------------------------------------------|--------------------------|
| <i>Primary care visits (physician or nurse)</i>                  | 35.80 € per visit        |
| <i>Specialist visit</i>                                          | €59.71 per visit         |
| <i>Daycare hospital</i>                                          | €203.7 per visit         |
| <i>Emergency room visit</i>                                      | €103.59 per visit        |
| <i>Hospital admission</i>                                        | € 2,259.86 per admission |
| <i>Skilled nursing facility</i>                                  |                          |
| Long term                                                        | €52.03 per day           |
| Convalescence                                                    | €90.04 per day           |
| Paliative care                                                   | €878.54 per visit        |
| <i>Mental health admission</i>                                   |                          |
| Acute                                                            | €181.18 per day          |
| Subacute                                                         | €114.00 per day          |
| <i>Minor outpatient surgery</i>                                  | €195.45 per act          |
| <i>Hospital at home</i>                                          | €966.47 per admission    |
| <i>Ambulatory rehabilitation</i>                                 | €175.15 per session      |
| <i>Nonurgent medical transportation</i>                          | €23.57 per act           |
| <i>Urgent medical transportation</i>                             | €196.63 per act          |
| <i>Dialysis</i>                                                  | €152.15 per session      |
| <i>Implants, prostheses and special techniques or procedures</i> | €474.61 per act          |
| <i>Pharmaceutical prescription</i>                               |                          |
| Primary care prescriptions                                       | €10.13 per drug box      |
| Hospital outpatient dispensing medication                        | €36.87 per drug box      |



Table 7 of the supplementary data

Characteristics of study participants included in the incident case analysis, overall and by K+ profile

|                        | All  | Normokalemic | Hyperkalemic | Hypokalemic |
|------------------------|------|--------------|--------------|-------------|
| <b>Overall</b>         | 8241 | 7722 (93.7)  | 327 (4.0)    | 192 (2.3)   |
| <i>Age, y</i>          |      |              |              |             |
| 55-64                  | 1603 | 1518 (94.7)  | 51 (3.2)     | 34 (2.1)    |
| 65-74                  | 2733 | 2577 (94.3)  | 102 (3.7)    | 54 (2.0)    |
| 75-84                  | 2875 | 2670 (92.9)  | 142 (4.9)    | 63 (2.2)    |
| ≥ 85                   | 1030 | 957 (92.9)   | 32 (3.1)     | 41 (4.0)    |
| <i>Sex</i>             |      |              |              |             |
| Men                    | 4392 | 4080 (92.9)  | 221 (5.0)    | 91 (2.1)    |
| Women                  | 3849 | 3642 (94.6)  | 106 (2.8)    | 101 (2.6)   |
| <i>Conditions*</i>     |      |              |              |             |
| CHF                    | 2263 | 2068 (91.4)  | 106 (4.7)    | 89 (3.9)    |
| CKD                    | 1129 | 1010 (89.5)  | 82 (7.3)     | 37 (3.3)    |
| DM                     | 3566 | 3281 (92.0)  | 208 (5.8)    | 77 (2.2)    |
| HTN                    | 7272 | 6810 (93.6)  | 290 (4.0)    | 172 (2.4)   |
| IHD                    | 2231 | 2077 (93.1)  | 105 (4.7)    | 49 (2.2)    |
| <i>EGFR categories</i> |      |              |              |             |
| 60                     | 4357 | 4144 (95.1)  | 108 (2.5)    | 105 (2.4)   |
| 45-59                  | 2162 | 2025 (93.7)  | 90 (4.2)     | 47 (2.2)    |
| 30-45                  | 1206 | 1100 (91.2)  | 80 (6.6)     | 26 (2.2)    |
| < 30                   | 516  | 453 (87.8)   | 49 (9.5)     | 14 (2.7)    |

CHF, congestive heart failure; CKD, chronic kidney disease; DM, diabetes mellitus; ED, emergency department; EGFR, estimated glomerular filtration rate; HTN, hypertension; IHD, ischemic heart disease; K+, potassium.

Results are presented as No. (%); %s are by rows. Percentages may not add up to 100% due to rounding.

All *P* values for chi-squared comparisons across K+ categories were < .001, except for CHF (.057) and IHD (.629).

\* Groups are not mutually exclusive; the same patient could have several relevant conditions simultaneously.

Individuals included in this analysis were those with no recorded evidence of any of the 5 relevant conditions as of January 1st, 2016, and who had a first recording of at least 1 of those conditions between January 2nd, 2016, and September 30th, 2017.

Table 8 of the supplementary data

Characteristics of study participants included in the prevalent case, prevalent user analysis, overall and by K+ profile

|                        | All   | Normokalemic | Hyperkalemic | Hypokalemic |
|------------------------|-------|--------------|--------------|-------------|
| <b>Overall</b>         | 24251 | 23309 (96.1) | 689 (2.8)    | 253 (1.0)   |
| <i>Age, y</i>          |       |              |              |             |
| 55-64                  | 4641  | 4492 (96.8)  | 96 (2.1)     | 53 (1.1)    |
| 65-74                  | 9122  | 8785 (96.3)  | 255 (2.8)    | 82 (0.9)    |
| 75-84                  | 7986  | 7655 (95.9)  | 249 (3.1)    | 82 (1.0)    |
| ≥ 85                   | 2502  | 2377 (95.0)  | 89 (3.6)     | 36 (1.4)    |
| <i>Sex</i>             |       |              |              |             |
| Men                    | 11622 | 11128 (95.7) | 375 (3.2)    | 119 (1.0)   |
| Women                  | 12629 | 12181 (96.5) | 314 (2.5)    | 134 (1.1)   |
| <i>Conditions*</i>     |       |              |              |             |
| CHF                    | 1944  | 1829 (94.1)  | 76 (3.9)     | 39 (4.0)    |
| CKD                    | 4418  | 4117 (93.2)  | 263 (6.0)    | 38 (0.9)    |
| DM                     | 8322  | 7871 (94.6)  | 381 (4.6)    | 70 (0.8)    |
| HTN                    | 23283 | 22378 (96.1) | 654 (2.8)    | 251 (1.1)   |
| IHD                    | 1951  | 1848 (94.7)  | 81 (4.2)     | 22 (1.1)    |
| <i>Medication use*</i> |       |              |              |             |
| ACEI                   | 14807 | 14230 (96.1) | 458 (3.1)    | 119 (0.8)   |
| ARB                    | 9345  | 8990 (96.2)  | 225 (2.4)    | 130 (1.4)   |
| MRA                    | 994   | 931 (93.7)   | 48 (4.8)     | 15 (1.5)    |
| <i>EGFR categories</i> |       |              |              |             |
| ≥ 60                   | 17336 | 16824 (97.0) | 326 (1.9)    | 186 (1.1)   |
| 45-59                  | 4297  | 4076 (94.9)  | 176 (4.1)    | 45 (1.0)    |
| 30-45                  | 2146  | 1994 (92.9)  | 135 (6.3)    | 17 (0.8)    |
| < 30                   | 472   | 415 (87.9)   | 52 (11.0)    | 5 (1.1)     |

ACEI, angiotensin-converting enzyme inhibitor; ARB, angiotensin receptor antagonist; CHF, congestive heart failure; CKD, chronic kidney disease; DM, diabetes mellitus; ED, emergency department; EGFR, estimated glomerular filtration rate; HTN, hypertension; IHD, ischemic heart disease; K+, potassium; MRA, mineralocorticoid receptor antagonist.

Results are presented as No. (%); %s are by rows. Percentages may not add 100% due to rounding.

All *P* values for chi-squared comparisons across K+ categories were < .001, except for sex (.002), HTN (.018) and IHD (.004).

\* Groups are not mutually exclusive; the same patient could have several relevant conditions and/or be treated with several renin-angiotensin-aldosterone system inhibitor (RAASI) drugs simultaneously.

Individuals included in this analysis were those who had at least 1 relevant condition as of January 1st, 2016 and were using at least one RAASI medication between October 1st, 2015 and January 1st, 2016.

Table 9 of the supplementary data

Characteristics of study participants included in the incident case, incident user analysis, overall and by K+ profile

|                        | All  | Normokalemic | Hyperkalemic | Hypokalemic |
|------------------------|------|--------------|--------------|-------------|
| <b>Overall</b>         | 4887 | 4568 (93.5)  | 216 (4.4)    | 103 (2.1)   |
| <i>Age, y</i>          |      |              |              |             |
| 55-64                  | 818  | 772 (94.4)   | 32 (3.9)     | 14 (1.7)    |
| 65-74                  | 1616 | 1522 (94.2)  | 64 (4.0)     | 30 (1.9)    |
| 75-84                  | 1825 | 1687 (92.4)  | 98 (5.4)     | 40 (2.2)    |
| ≥85                    | 628  | 587 (93.5)   | 22 (3.5)     | 19 (3.0)    |
| <i>Sex</i>             |      |              |              |             |
| Men                    | 2588 | 2396 (92.6)  | 146 (5.6)    | 46 (1.8)    |
| Women                  | 2299 | 2172 (94.5)  | 70 (3.0)     | 57 (2.5)    |
| <i>Conditions*</i>     |      |              |              |             |
| CHF                    | 460  | 419 (91.1)   | 27 (5.9)     | 14 (3.0)    |
| CKD                    | 687  | 617 (89.8)   | 55 (8.0)     | 15 (2.2)    |
| DM                     | 1566 | 1413 (90.2)  | 114 (7.3)    | 39 (2.5)    |
| HTN                    | 3708 | 3444 (92.9)  | 175 (4.7)    | 89 (2.4)    |
| IHD                    | 390  | 360 (92.3)   | 20 (5.1)     | 10 (2.6)    |
| <i>Medication use*</i> |      |              |              |             |
| ACEI                   | 2947 | 2768 (93.9)  | 132 (4.5)    | 47 (1.6)    |
| ARB                    | 1839 | 1708 (92.9)  | 80 (4.4)     | 51 (2.8)    |
| MRA                    | 432  | 396 (91.7)   | 25 (5.8)     | 11 (2.5)    |
| <i>EGFR categories</i> |      |              |              |             |
| ≥ 60                   | 2371 | 2255 (95.1)  | 66 (2.8)     | 50 (2.1)    |
| 45-59                  | 1466 | 1372 (93.6)  | 62 (4.2)     | 32 (2.2)    |
| 30-45                  | 822  | 742 (90.3)   | 65 (7.9)     | 15 (1.8)    |
| < 30                   | 228  | 199 (87.3)   | 23 (10.1)    | 6 (2.6)     |

ACEI, angiotensin converting enzyme inhibitor; ARB, angiotensin receptor blocker; CHF, congestive heart failure; CKD, chronic kidney disease; DM, diabetes mellitus; ED, emergency department; EGFR, estimated glomerular filtration rate; HTN, hypertension; IHD, ischemic heart disease; K+, potassium; MRA, mineralocorticoid-receptor antagonists; RAASI, renin-angiotensin-aldosterone system inhibition. Results are presented as No. (%); %s are by rows. Percentages may not add 100% due to rounding.

All *P* values for chi-squared comparisons across K+ categories were < .05, except for age (.116), CHF (.089), IHD (.618) and IAL (.272).

\* Groups are not mutually exclusive; a same patient could have several conditions and/or be treated with several RAASI drugs simultaneously.

Individuals included in this analysis were those with no recorded evidence of any of the 5 relevant conditions as of January 1st, 2016, who had a first recording of at least one of those conditions between January 2nd, 2016, and September 30th, 2017 and who had a first recording of RAASI medication use during that same period.



Table 10 of the supplementary data

Subgroup analysis by prevalent condition as of January 1st, 2016 (prevalent case analysis): associations between K+ abnormalities and clinical endpoints

|              | All-cause death  | Hospitalization  | ED visit         | Daycare visit* |
|--------------|------------------|------------------|------------------|----------------|
| <i>CHF</i>   |                  |                  |                  |                |
| Hyperkalemic | 1.22 (0.76-1.98) | 1.35 (1.03-1.77) | 0.97 (0.74-1.27) | N/A            |
| Hypokalemic  | 2.34 (1.46-3.75) | 1.30 (0.86-1.94) | 1.04 (0.72-1.50) | N/A            |
| <i>CKD</i>   |                  |                  |                  |                |
| Hyperkalemic | 1.35 (0.99-1.84) | 1.14 (0.95-1.36) | 1.16 (1.01-1.34) | N/A            |
| Hypokalemic  | 3.21 (2.05-5.03) | 1.22 (0.82-1.81) | 1.11 (0.81-1.52) | N/A            |
| <i>DM</i>    |                  |                  |                  |                |
| Hyperkalemic | 1.03 (0.73-1.45) | 1.08 (0.92-1.28) | 1.06 (0.94-1.21) | N/A            |
| Hypokalemic  | 2.43 (1.58-3.74) | 0.97 (0.67-1.41) | 0.88 (0.66-1.18) | N/A            |
| <i>HTN</i>   |                  |                  |                  |                |
| Hyperkalemic | 1.32 (1.03-1.68) | 1.10 (0.96-1.25) | 1.06 (0.96-1.17) | N/A            |
| Hypokalemic  | 2.48 (1.85-3.33) | 1.12 (0.90-1.39) | 1.06 (0.91-1.24) | N/A            |
| <i>IHD</i>   |                  |                  |                  |                |
| Hyperkalemic | 1.02 (0.57-1.84) | 0.92 (0.67-1.28) | 0.84 (0.64-1.09) | N/A            |
| Hypokalemic* | N/A              | N/A              | N/A              | N/A            |

CHF, congestive heart failure; CKD, chronic kidney disease; DM, diabetes mellitus; ED, emergency department; EGFR, estimated glomerular filtration rate; HTN, hypertension; IHD, ischemic heart disease; K+, potassium; N/A, not applicable

\* The analysis could not be conducted due to the small number of events in this stratum

Individuals included in this analysis were those who had at least one relevant condition as of January 1st, 2016.

The analyses for hospitalization, ED visits and daycare visits accounted for the competing risk with death. Models adjusted for age, sex, socioeconomic status, comorbidities, EGFR, medication use, duration of disease, prior hospitalizations, prior ED visits, and prior serum K+ measurements.

Table 11 of the supplementary data

Subgroup analysis by incident condition (incident case analysis): associations between K+ abnormalities and clinical endpoints

|              | All-cause death  | Hospitalization  | ED visit         | Daycare visit* |
|--------------|------------------|------------------|------------------|----------------|
| <i>CHF</i>   |                  |                  |                  |                |
| Hyperkalemic | 1.44 (0.93-2.22) | 0.85 (0.62-1.15) | 0.83 (0.63-1.08) | N/A            |
| Hypokalemic  | 1.72 (1.09-2.71) | 0.99 (0.67-1.47) | 0.94 (0.68-1.30) | N/A            |
| <i>CKD</i>   |                  |                  |                  |                |
| Hyperkalemic | 1.48 (1.02-2.14) | 1.19 (0.95-1.50) | 1.07 (0.88-1.31) | N/A            |
| Hypokalemic  | N/A              | N/A              | N/A              | N/A            |
| <i>DM</i>    |                  |                  |                  |                |
| Hyperkalemic | 1.50 (1.04-2.16) | 1.04 (0.83-1.30) | 1.00 (0.82-1.22) | N/A            |
| Hypokalemic  | 1.66 (0.94-2.90) | 1.22 (0.81-1.84) | 1.25 (0.91-1.73) | N/A            |
| <i>HTN</i>   |                  |                  |                  |                |
| Hyperkalemic | 1.40 (1.00-1.95) | 1.06 (0.86-1.30) | 1.05 (0.89-1.25) | N/A            |
| Hypokalemic  | 1.96 (1.34-2.87) | 1.44 (1.11-1.88) | 1.34 (1.08-1.66) | N/A            |
| <i>IHD</i>   |                  |                  |                  |                |
| Hyperkalemic | 1.94 (1.20-3.14) | 1.04 (0.77-1.40) | 0.70 (0.64-1.19) | N/A            |
| Hypokalemic* | N/A              | N/A              | N/A              | N/A            |

CHF, congestive heart failure; CKD, chronic kidney disease; DM, diabetes mellitus; ED, emergency department; EGFR, estimated glomerular filtration rate; HTN, hypertension; IHD, ischemic heart disease; K+, potassium; N/A, not applicable

\* The analysis could not be conducted due to the small number of events in this stratum

Individuals included in this analysis were those with no recorded evidence of any of the 5 relevant conditions as of January 1st, 2016, and who had a first recording of at least one of those conditions between January 2nd, 2016, and September 30th, 2017.

The analyses for hospitalization, ED visits and daycare visits accounted for the competing risk with death. Models adjusted for age, sex, socioeconomic status, comorbidities, EGFR, and medication use.

Table 12 of the supplementary data

Subgroup analysis by prevalent condition as of January 1st, 2016 (prevalent case, prevalent user analysis): associations between K+ abnormalities and clinical endpoints

|              | All-cause death  | Hospitalization  | ED visit         | Daycare visit* |
|--------------|------------------|------------------|------------------|----------------|
| <i>CHF</i>   |                  |                  |                  |                |
| Hyperkalemic | 1.62 (0.93-2.82) | 1.17 (0.83-1.63) | 0.90 (0.65-1.25) | N/A            |
| Hypokalemic* | N/A              | N/A              | N/A              | N/A            |
| <i>CKD</i>   |                  |                  |                  |                |
| Hyperkalemic | 1.86 (1.28-2.69) | 1.21 (0.96-1.52) | 1.23 (1.03-1.46) | N/A            |
| Hypokalemic* | N/A              | N/A              | N/A              | N/A            |
| <i>DM</i>    |                  |                  |                  |                |
| Hyperkalemic | 1.30 (0.87-1.95) | 1.15 (0.94-1.40) | 1.13 (0.97-1.31) | N/A            |
| Hypokalemic  | 3.43 (1.87-6.30) | 1.25 (0.79-1.97) | 1.01 (0.70-1.48) | N/A            |
| <i>HTN</i>   |                  |                  |                  |                |
| Hyperkalemic | 1.71 (1.28-2.28) | 1.09 (0.93-1.28) | 1.07 (0.96-1.21) | N/A            |
| Hypokalemic  | 2.65 (1.77-3.96) | 1.14 (0.87-1.49) | 1.07 (0.88-1.31) | N/A            |
| <i>IHD</i>   |                  |                  |                  |                |
| Hyperkalemic | 1.48 (0.74-2.97) | 0.80 (0.52-1.23) | 0.81 (0.58-1.14) | N/A            |
| Hypokalemic* | N/A              | N/A              | N/A              | N/A            |

CHF, congestive heart failure; CKD, chronic kidney disease; DM, diabetes mellitus; ED, emergency department; EGFR, estimated glomerular filtration rate; HTN, hypertension; IHD, ischemic heart disease; K+, potassium; N/A, non-applicable

\* The analysis could not be conducted due to the small number of events in this stratum

Individuals included in this analysis were those who had at least one relevant condition as of January 1st, 2016 and were using at least one RAASI medication between October 1st, 2015 and January 1st, 2016.

The analyses for hospitalization, ED visits and daycare visits accounted for the competing risk with death. Models were adjusted for age, sex, socioeconomic status, comorbidities, EGFR, medication use, duration of disease, prior hospitalizations, prior ED visits, and prior serum K+ measurements.

Figure 1 of the supplementary data. Study design, period of evaluation and follow-up period for the prevalent case analysis (individuals with prevalent chronic cardiovascular and renal conditions, regardless of use of RAASI medications)

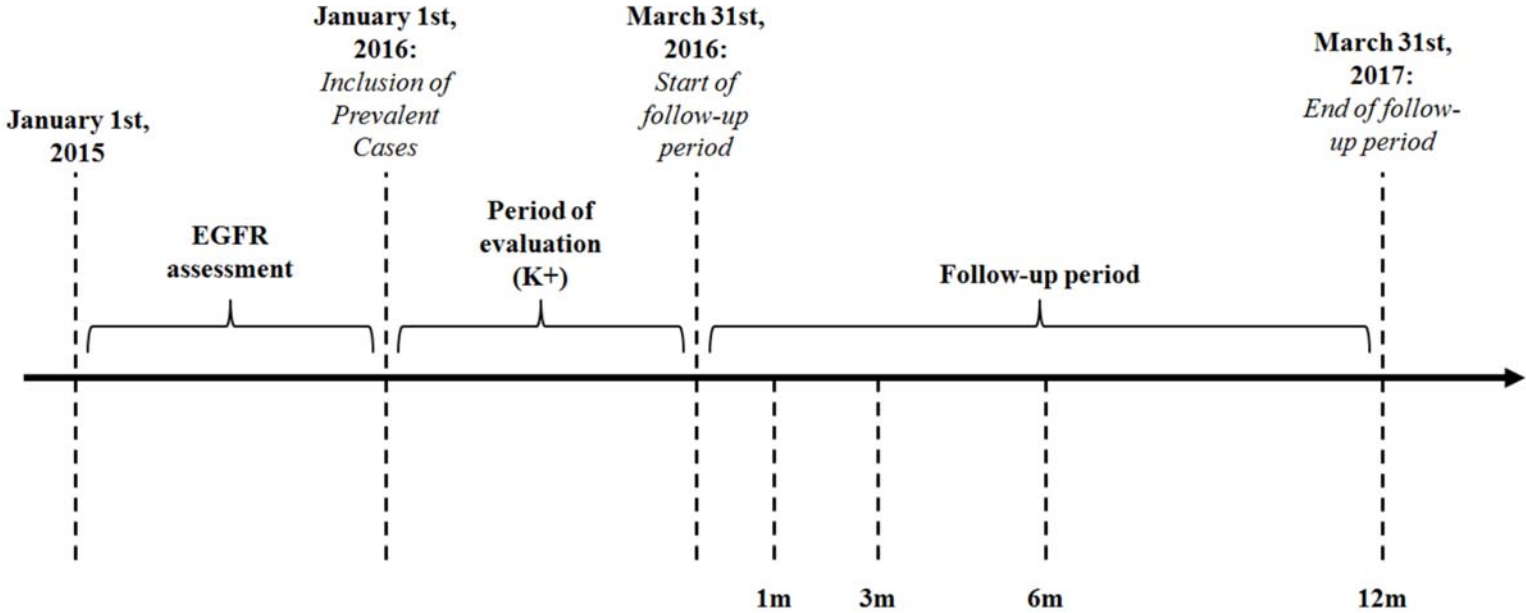

EGFR, estimated glomerular filtration rate; K+, potassium; m, months; RAASI, renin-angiotensin-aldosterone system inhibitor(s).

Figure 2 of the supplementary data. Study design, period of evaluation and follow-up period for the incident case analysis (individuals with incident chronic cardiovascular and renal conditions, regardless of use of RAASI medications).

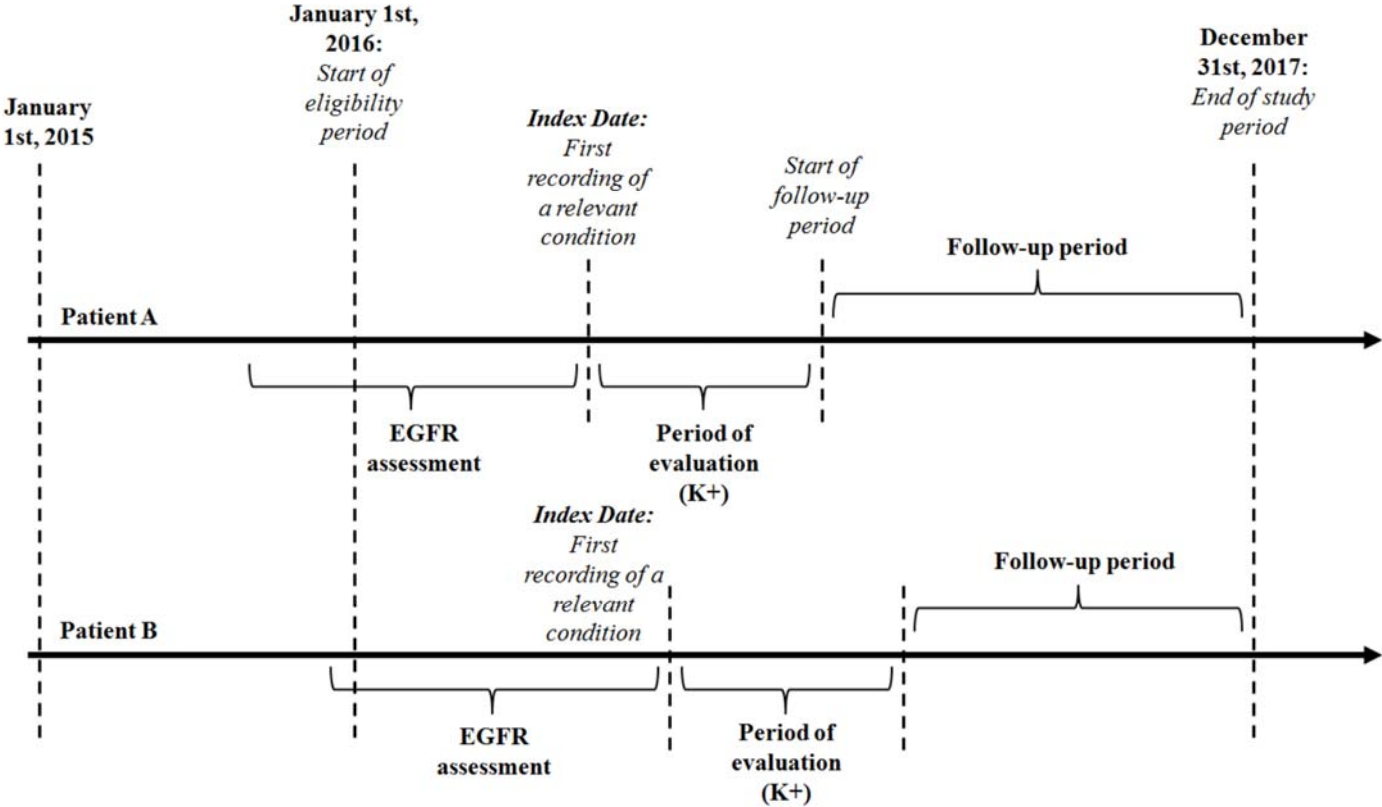

EGFR, estimated glomerular filtration rate; K+, potassium; m, months; RAASI, renin-angiotensin-aldosterone system inhibitor(s).

Figure 3 of the supplementary data. Study design, period of evaluation and follow-up period for the prevalent case, prevalent user analysis (patients with prevalent chronic cardiovascular and renal conditions and using at least one RAASI medication as of January 1st, 2016).

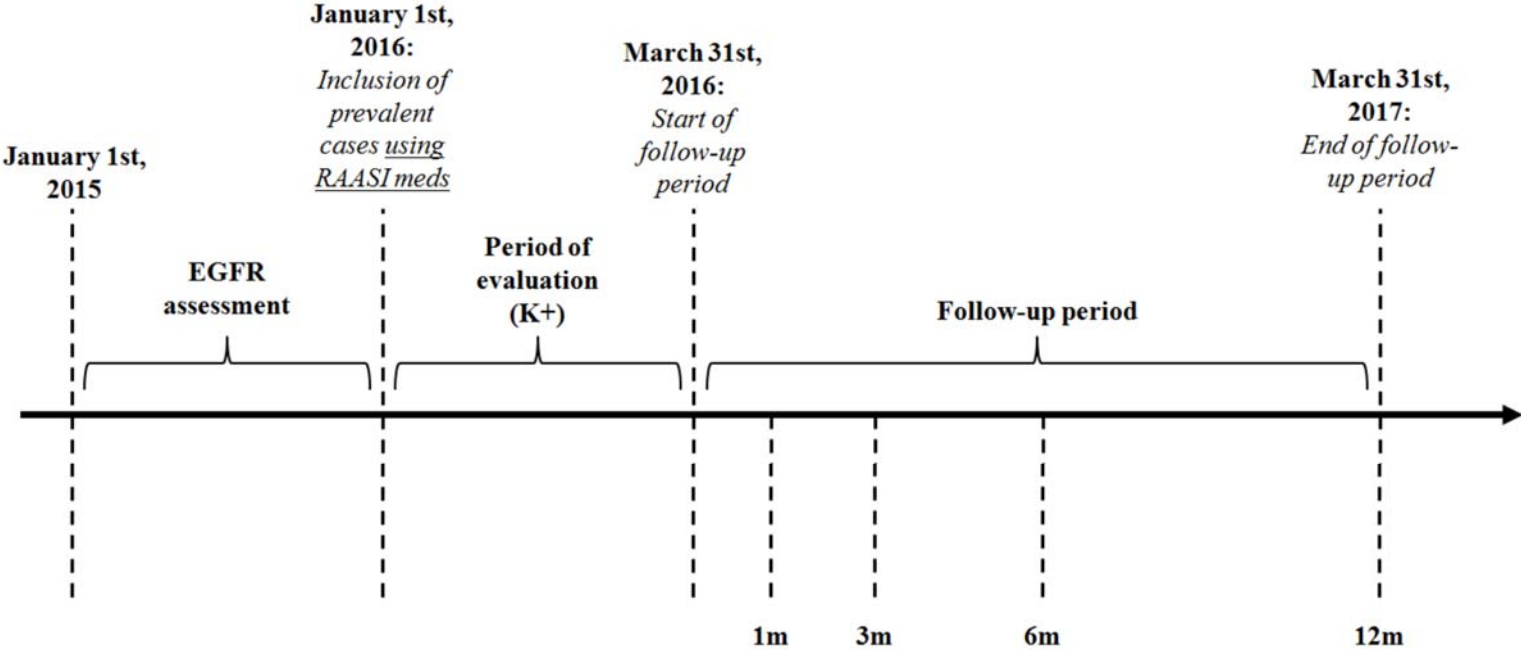

EGFR, estimated glomerular filtration rate; K+, potassium; m, months; RAASI, renin-angiotensin-aldosterone system inhibitor(s).

Figure 4 of the supplementary data. Study design, period of evaluation and follow-up period for the incident case, incident user analysis (patients with incident chronic cardiovascular and renal conditions and starting at least one RAASI medication).

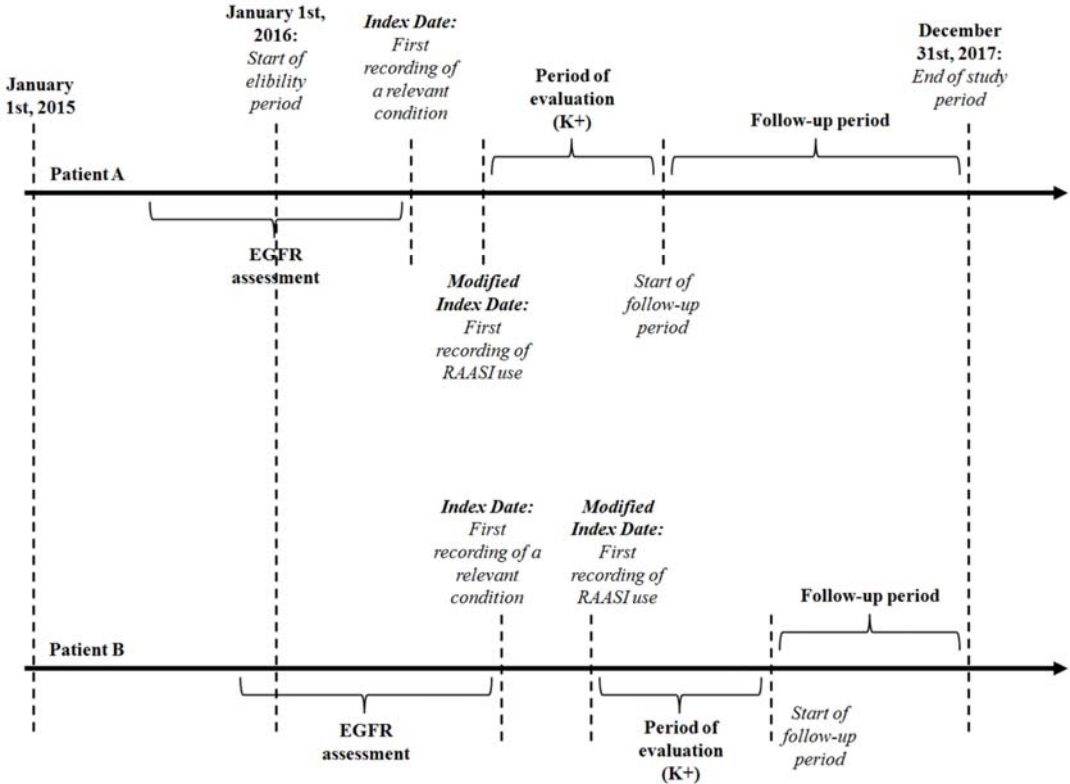

EGFR, estimated glomerular filtration rate; K+, potassium; m, months; RAASI, renin-angiotensin-aldosterone system inhibition

Corrección a la figura
